# Supplementary material for: Further phenotypical delineation of DLG3-related neurodevelopmental disorders
Source: Research Square preprint supplement (doi:10.21203/rs.3.rs-5998122/v1), 2025-03-10
Supplement: Supplementary file 1 [file 1a7b9c9b23246eafbc2ae159.docx]

**Supplemental methods**

***In silico* structural modelling**

*DLG3* variants models of our cohort’s variants have been calculated from AlphaFold prediction model of the full-length protein and PDB data (<https://www.rcsb.org/structure/1UM7>) available online. For each model, a protein segment was selected to include the variant and surrounding regions. For p.(Arg385Cys), the segment was selected between residues 355 and 464, including both the variant and the PDZ3 domain. For p.(Arg574Gln), the segment spans from residues 501 to 581. For p.(Arg661Trp), the segment was selected from residues 615 to 700.

The molecular visualization system used was PyMOL 2.5.4. For each representation, segments were illustrated as “cartoon” views in 70% gray. The desired residue was represented as sphere and alpha carbon was hidden. When relevant, the PDZ3 domain was represented as surface with transparency set to 30% and pseudo colored in green.

Variant models were obtained using the “Wizard Mutagenesis” option in PyMOL with selection of the residue of interest to perform the simulation. When different rotamers were available, the one providing the least level of constrains was selected. Finally, electrostatic interactions were calculated for both wild-type and simulated variant situations.

Electrostatic interactions were rendered using the APBS (Adaptative Poisson-Boltzmann Solver) module within PyMOL. Rendered calculations were superimposed to the segments with transparency set to 0%.

Models of *DLG3* variants from the literature were performed when no models were available. They were calculated from a prediction model obtained using SwissModel by combining a model whose conformation was predicted to be nearly similar (99.97% of probability from residue 363) to that of DLG3 protein (PDB data from model 4WSI_B (selected after checking conformational similarities using HHpred(1)) and the FASTA sequence of *DLG3* from UniProt. Then, both the wild-type and variant models were aligned. For each model, a protein segment was selected to include the variant and surrounding regions of interest. The molecular visualization system used was RCSB’s MolStar.

**Genetic analysis**

*DLG3* variants have been identified by exome sequencing (ES) (individuals 1, 2, 8, 9, 10, 11, 12, 14, 15 and 16), genome sequencing (GS) (individuals 3, 5 and 6), targeted genes panel (individuals 4, 7 and 13) or chromosomal microarray (individual 17). When available, trio-based ES and GS were preferentially used (individual and both parents) using methods specific at each laboratory (details vary depending on the individual, available on request). Variants were classified using the ACMG guideline 2015(2). Genes panels sequencing were performed in the two brothers carrying the p.(Arg574Gln) variant.

ES methods (exome enrichment, read alignment, bioinformatic analysis) used for individuals 1 and 2 were previously described(3). Following genes panel, a RT-PCR was performed on RNA extracted in individual 4. GS performed in individual 5 was part of the DEFIDIAG Study project (ClinicalTrials.gov identifier: NCT04154891) using previously reported protocol and methods(4). Genes panel carried out in individual 7 contained 275 genes, sequence was generated on NextSeq550 instrument (Illumina Inc.), and bioinformatic analysis used a local pipeline. For individuals 8 and 10, exons were captured using SeqCap EZ MedExome kit or HyperExome (Roche Technologies) kit respectively, and sequence were generated on a NextSeq500 instrument (Illumina Inc.). ES in individual 9 was performed according to Blueprint Genetics Whole Exome Family Plus Test (version 2, Feb 9, 2018), coupled with Whole Exome Deletion/Duplication Analysis. Genes panel carried out in individual 13 included 275 genes involved in neurodevelopmental disorders, following a basis proposed by Dr Piton et al. in 2014(5). ES performed in individuals 14 and 15 were obtained using IntegraGen SA (Evry, France) and the Real-Time Analysis software sequence pipeline (v2.7.7) with default parameters. ES performed in individual 16 was generated on NextSeq2000 instrument (Illumina Inc.), and *DLG3* variant was confirmed by Sanger sequencing in the individual 16 and its parents. RT-PCR was then performed on RNA extracted from PAXgene tube using primers on exon 16 and 19 of *DLG3*.

Additional other genetic analysis (e.g. karyotype, chromosomal microarray, FMR1 repeats) could have been performed.

**URLs**

AlphaFold: <https://alphafold.com/>

AlphaFold (PDB data): <https://alphafold.ebi.ac.uk/entry/Q92796>

Dynamut2: <https://biosig.lab.uq.edu.au/dynamut2/>

Genematcher: <https://genematcher.org/>

GnomAD v2.1.1: <https://gnomad.broadinstitute.org/gene/ENSG00000082458?dataset=gnomad_r2_1>

GnomAD v4.1: <https://gnomad.broadinstitute.org/gene/ENSG00000082458?dataset=gnomad_r4>

HHpred: <https://toolkit.tuebingen.mpg.de/tools/hhpred>

Metadome: <https://stuart.radboudumc.nl/metadome/dashboard/transcript/ENST00000374360.3/>

Mobidetails: <https://mobidetails.iurc.montp.inserm.fr/MD/gene/DLG3>

MolStar viewer (using RCSB): <https://www.rcsb.org/3d-view>

PERSYST: <https://www.australiangenomics.org.au/tools-and-resources/persyst-pathogenic-evaluation-of-recalcitrant-variants-by-systematic-transactivation/>

PyMOL 2.5.4: <https://pymol.org/>

RCSB : <https://www.rcsb.org/3d-view>

SwissModel : <https://swissmodel.expasy.org/interactive>

UniProt: <https://www.uniprot.org/uniprotkb/Q92796/entry>

**References**

1. Zimmermann L, Stephens A, Nam SZ, Rau D, Kübler J, Lozajic M, et al. A Completely Reimplemented MPI Bioinformatics Toolkit with a New HHpred Server at its Core. J Mol Biol. 20 juill 2018;430(15):2237‑43.

2. Richards S, Aziz N, Bale S, Bick D, Das S, Gastier-Foster J, et al. Standards and Guidelines for the Interpretation of Sequence Variants: A Joint Consensus Recommendation of the American College of Medical Genetics and Genomics and the Association for Molecular Pathology. Genet Med Off J Am Coll Med Genet. mai 2015;17(5):405‑24.

3. Nambot S, Thevenon J, Kuentz P, Duffourd Y, Tisserant E, Bruel AL, et al. Clinical whole-exome sequencing for the diagnosis of rare disorders with congenital anomalies and/or intellectual disability: substantial interest of prospective annual reanalysis. Genet Med. 1 juin 2018;20(6):645‑54.

4. Binquet C, Lejeune C, Faivre L, Bouctot M, Asensio ML, Simon A, et al. Genome Sequencing for Genetics Diagnosis of Patients With Intellectual Disability: The DEFIDIAG Study. Front Genet [Internet]. 1 févr 2022 [cité 23 mars 2024];12. Disponible sur: https://www.frontiersin.org/journals/genetics/articles/10.3389/fgene.2021.766964/full

5. Redin C, Gérard B, Lauer J, Herenger Y, Muller J, Quartier A, et al. Efficient strategy for the molecular diagnosis of intellectual disability using targeted high-throughput sequencing. J Med Genet. 1 nov 2014;51(11):724‑36.
