# Supplementary material for: Further phenotypical delineation of DLG3-related neurodevelopmental disorders
Source: Research Square preprint supplement (doi:10.21203/rs.3.rs-5998122/v1), 2025-03-10
Supplement: Supplementary file 2 [file 3fc69f233f7d06c821f7e81d.docx]

**Supplemental results**

**Table 1. Clinical features of cohort’s patients carrying a VUS.** Abbreviations: Y : years ; M : months ; OFC: occipital frontal circumference; NA : non available ; ADHD: attention deficit hyperactivity disorder; ASD: autism spectrum disorder; UCS: unilateral convergent strabismus.

|  | **Individual 11** | **Individual 12** | **Individual 13** | **Individual 14** | **Individual 15** | **Individual 16** | **Individual 17** |
| --- | --- | --- | --- | --- | --- | --- | --- |
| **Other VUS** | **Missense** | **Missense** | **Missense** | **Missense** | **Other VUS** | **Other VUS** |
| Gender | Male | Male | Male | Male | Male | Male | Male |
| Age | 38Y | 2Y6M | 4Y | 12Y1M | 19Y2M | 4Y | 9Y9M |
| **Gestation and birth** | |  |  |  |  |  |  |
| Events during pregnancy | - | - | - | - | - | - | Abnormal bright spot in intestines |
| Age of delivery (weeks of gestational age) | 42 | 38+3 | 39 | 37 | 38+3 | 38+6 | 40 |
| Events during delivery/perinatal period | Induction of labour | - | - | - | - | - | At birth: terminal bradycardia and respiratory depression, APGAR: 6/9, required stimulation, suction, and blow-by  Good recovery, return home at day of life 3 |
| Birth weight: g (percentile) | 3,175 (4th) | 4,190 (98th) | 3,100 (28th) | 3,120 (65th) | 3,330 (57th) | 2,940 (19th) | 3,118 (16th) |
| Birth length: cm (percentile) | NA | 54 (97th) | 51 (63th) | 50 (76th) | 50 (55th) | 48 (18th) | 49.5 (23th) |
| Birth OFC: cm (percentile) | NA | 33.5 (32th) | 33 (15th) | 33 (41th) | 34.5 (58th) | 33 (16th) | 34 (23th) |
| Events during neonatal period | - | Uncomplicated hyperbilirubinemia | - | - | - | - | - |
| **Last measurements** | |  |  |  |  |  |  |
| Weight: kg (percentile) | NA | 15.4 (88th) | 21 (97th) | 42 (55th) | 69 (49th) | 15.4 (33th) | 39.6 (88th) |
| Height: cm (percentile) | 175.5 (43th) | 98.5 (97th) | 112 (99th) | 150 (52th) | 176 (46th) | 105 (74th) | 144.4 (86th) |
| OFC: cm (percentile) | 56.5 (83th) | NA | 52 (87th) | 54 (56th) | 58 (98th) | 49 (17th) | 55.5 (98th) |
| Intellectual disability (ID) | + | Suspected | Suspected | + | + | Suspected | + |
| Type | Moderate ID | NA | NA | Mild ID | Mild ID | N | Severe ID |
| Developmental delay | + | + | + | - | - | + | + |
| Type | Global | Global | Global | No motor developmental delay | No motor developmental delay | Language | Language |
| Age of sitting | NA | NA | 9M | 9M | 9M | NA | 7M |
| Age of walking | 18-20M | 10M | 17M | 16M | 17M | 17M | 13M |
| Age of first words | 3Y | 13M | 3Y | NA | NA | 2Y7M | 4Y |
| Age of first sentences | 5-6Y | Not acquired | Not acquired | NA | NA | Not acquired | 4Y |
| Language at last assessment | Sentences | 1-2 words | Some echolalia, expression by shouting, comprehension limited to few simple commands | Normal | Normal | Words association | Begins to have language development at a 30M level, with upward deviation to a 3 year-old level |
| Other neurodevelopmental disorders | ADHD | ASD | ASD, hyperactive behavior | Concentration disorder | NA | Attention deficit | ASD, agitation |
| Psychiatric disorders | - | - | Behavioral disorders (auto-aggressiveness, anger), selective eating and orality disorder | Anxiety, verbal and physical aggressiveness | Anxiety, depression, child psychosis, suicide attempt | - | Aggressiveness |
| Seizures | - | - | - | - | NA | - | - |
| Other neurologic features | - | Generalized hypotonia | - | NA | NA | - | Hypotonia |
| Brain imagery | NA | Stable subcentimeter cystic space in the right temporal lobe without any suspicious features, and bifrontal periventricular gray matter heterotopias | NA | Unremarkable | NA | Unremarkable | Pituitary gland within normal limits |
| **Morphological features** | |  |  |  |  |  |  |
| Abnormal morphological features | + | + | + | + | + | + | - |
| Details | Thick eyebrows, broad nose, wide philtrum, full lips, bilateral clinodactyly, medial deviation of his distal interphalangeal joints, wide sandal gap | Epicanthal folds, flat nasal bridge, wide mouth, bifid uvula | Abnormal front hair implantation, eyesbrows with thin external tier, bulbous nose, short philtrum, two café-au-lait stain | High-arched palate | High-arched palate | Small anteverted nose, large philtrum, large ears | - |
| Visual impairments | - | Myopia, astigmatism | - | - | NA | - | Low myopia |
| Strabismus | - | - | - | UCS | NA | - | - |
| Auditory impairments | - | - | - | NA | NA | - | - |
| Other clinical features | - | Laryngomalacia, obstructive sleep apnea | Decreased pain sensitivity (reported by parents) | Sacrococcygeal cyst | Sacrococcygeal cyst | - | - |

**Table 2. a- Molecular details of all missense variants in the present cohort and the secondarily reclassified p.(Arg574Gln) variant.** Molecular details and ACMG criteria for the p.(Arg385Cys), p.(Ser491Cys) and p.(Arg661Trp) variants classified as variant of uncertain significance (VUS), and the reclassified as likely benign p.(Arg574Gln) variant.

|  | **Individual 11** | **Individual 12** | **Individuals 13 and 14** | ***Siblings with reclassified variant*** |
| --- | --- | --- | --- | --- |
| **Variant (NM_021120.4)** | c.1153C>T | c.1472C>G | c.1981C>T | *c.1721G>A* |
| **Variant (protein)** | p.(Arg385Cys) | p.(Ser491Cys) | p.(Arg661Trp) | *p.(Arg574Gln)* |
| ***DLG3* variant evidenced by** | Exome sequencing | Genes panel | Exome sequencing | *Genes panel* |
| **GnomAD v4.1.0** | 1 male | Absent | Absent | *18 males and 24 females* |
| **Frequency in European non-Finnish males in gnomAD v4.1.0** | 0.000001 | / | / | *0.00006* |
| **Domain** | PDZ-associated domain of NMDA receptors | No | Guanylate kinase domain | *No* |
| **Tolerance (MetaDome)** | Neutral (0.79) | Intolerant (0.27) | Intolerant (0.47) | *Intolerant (0.29)* |
| ***In silico* scores** | Overall damaging effect (polyphen-2: 0.98; CADD: 27.6; REVEL 0.54) | Contradictory (CADD: 26; polyphen-2: 0.97; REVEL: 0.431)  No splicing effect | Damaging effect (CADD: 25.9; polyphen-2: 1; REVEL: 0,614) | *Overall damaging effect (CADD: 24.8; Polyphen-2: 0.428; REVEL: 0.74)*  *Uncertain splicing effect (SPiP: 47.89; spliceAI: negative)* |
| **Modeling (Figure 2)** | Predicted to have little impact on structure and on surface charge but could be sufficient to induce a perturbation of the third PDZ domain | Little structural impact expected but disulfide bridge formation cannot be ruled out | Important structural perturbation | *Visible change in surface charge with no interaction predicted with the third PDZ domain* |
| **Fauchère and Pliska hydrophobicity scale** | From -1.01 (hydrophilic) to 1.54 (hydrophobic) | From -0.04 (slightly hydrophilic) to 1.54 (hydrophobic) | From -1.01 (hydrophilic) to 2.25 (hydrophobic) | *From -1.01 (hydrophilic) to -0.22 (hydrophilic)* |
| **ACMG classification and**  **ACMG criteria** | 3  PP3 BP1 | 3  PM2 BP1 | 3  PM2 PP3 BP1 | *2*  *PP3 BS1 BP1* |
| **Final reclassification** | VUS | VUS | VUS | *Likely benign* |

**Table 2. b- Molecular and clinical details of literature patients’ carriers of a missense variant.** “Causal” is indicated when the authors classified a variant as causal for the patient’s phenotype but precise original variant classification was not available. *This variant was present in an individual in association with the NM_021120:c.48G>C variant, which is not represented in this table as we were unable to confirm its nomenclature. Abbreviations: ASD: autism spectrum disorder; DD: developmental delay; ID: intellectual disability, ADHD: attention deficit with hyperactivity.

| **Variants (cDNA)** | **Variants (protein)** | **Main clinical features** | **GnomAD v4.1.0** | ***In silico* scores** | **Original variant classification** | **Reclassification and ACMG criteria** | **Reported in** |
| --- | --- | --- | --- | --- | --- | --- | --- |
| **c.18C>G** | **p.(His6Gln)** | Seizure, ASD, DD, ID | Absent | CADD: 25.2; Polyphen-2: 0.93, REVEL: 0.151 | Causal | - | He et al.  Case 1 |
| **c.128G>T** | **p.(Gly43Val)** | Seizure without neurodevelopmental disorder and normal brain MRI | 5 males and 18 females | CADD: 23.4; Polyphen-2: 0.999, REVEL: 0.107 | Causal | Likely benign  BP1 BS1 | He et al.  Case 2 |
| **c.128G>T** | **p.(Gly43Val)** | Seizure without neurodevelopmental disorder and normal brain MRI | He et al.  Case 3 |
| **c.251C>T** | **p.(Pro84Leu)** | No description available | 6 males and 10 females | CADD: 22.8; Polyphen-2: 0.001, REVEL: 0.084 | 4 | Likely benign  BP1 BP4 BS1 | Marinakis et al.  Patient 8068 |
| **c.304G>A*** | **p.(Gly102Ser)*** | Tall stature, macrocephaly, mild ID | 2067 males and 4616 females | CADD: 19.82; Polyphen-2: 0.001; REVEL: 0.064 | 3 | Likely benign  BP1 BS1 | Tzschach et al.  Patient 122038 |
| **c.463C>T** | **p.(Pro155Ser)** | Seizure, gray matter heterotopias, mild ID | Absent in males, 3 females | CADD: 22.9; Polyphen-2: 0.898; REVEL:0.207 | Causal | - | He et al.  Case 4 |
| **c.593G>A** | **p.(Arg198Gln)** | Seizure, ASD, ADHD, speech delay | 6 males and 9 females | CADD: 22.3; Polyphen-2: 0.724; REVEL: 0.115 | Causal | Likely benign  BP1 BS1 | He et al.  Case 5 |
| **c.1415G>A** | **p.(Arg472His)** | Seizure, ID, speech delay | 2 males and 6 females | CADD: 30; Polyphen-2: 0.999; REVEL: 0.373 | Causal | - | He et al.  Case 6 |
| **c.1424C>T** | **p.(Ser475Leu)** | ID | 13 males and 25 females | CADD: 24.5; Polyphen,-2: 0.952; REVEL: 0.266 | 3 | Likely benign  BP1 BS1 | Ibarluzea et al.  Family ID1010 (siblings) |
| **c.1424C>T** | **p.(Ser475Leu)** | ID |
| **c.1486C>T** | **p.(Leu496Phe)** | Moderate ID, global DD, cerebellar ataxia | Absent | CADD: 25.2; Polyphen-2: 0.999; REVEL: 0.159 | 3 | - | Taşkiran et al.  Family 5 (siblings) |
| **c.1486C>T** | **p.(Leu496Phe)** | Severe ID, global DD, cerebellar ataxia |
| **c.1721G>A** | **p.(Arg574Gln)** | ID, morphological features, ataxia, hypotonia, microcephaly, seizure | 18 males and 24 females | CADD: 24.8; Polyphen-2: 0.971; REVEL: 0.741; SPiP: 47.89 | 4 | Likely benign  BP1 BS1 | Bowling et al.  Patient 00063-C |
| **c.1792G>A** | **p.(Asp598Asn)** | Global DD, seizure or encephalopathy, gastrointestinal disorder, hearing loss or visual impairment | Absent | CADD: 23.7; Polyphen-2: 0; REVEL: 0.167 | 3 | - | van der Ven et al.  Patient HH_NEO064 |
| **c.1861C>T** | **p.(Arg621Trp)** | Epileptic encephalopathy | Absent in males, 3 females | CADD: 28.4; Polyphen-2: 0.999; REVEL: 0.698 | 4 | - | Jiang et al  Patient ID 28 |
| **c.1998T>A** | **p.(Asn666Lys)** | Seizure without neurodevelopmental disorder and normal brain MRI | Absent in males, 1 female | CADD: 20.7; Polyphen-2: 0.974; REVEL: 0.083 | Causal | - | He et al.  Case 7 |
| **c.2101C>T** | **p.(Leu701Phe)** | ID, morphological features, language delay, ADHD, seizure, hirsutism, bone growth acceleration | Absent | CADD: 25; Polyphen-2: 1; REVEL: 0.504 | 3 | - | Chen et al.  Patient P21 |
| **c.2267G>A** | **p.(Arg756Gln)** | Global DD, ID, epilepsy, behavioral disorder | 2 males and 5 females | CADD: 25.1; Polyphen-2: 0.7; REVEL: 0.071 | Causal | - | Alagoz et al.  Case 1 |
| **c.2359G>A** | **p.(Gly787Ser)** | DD, ID, ASD | Absent in males, 1 female | CADD: 27; Polyphen-2: 1; REVEL: 0.534 | Causal | - | Alagoz et al.  Case 2 |


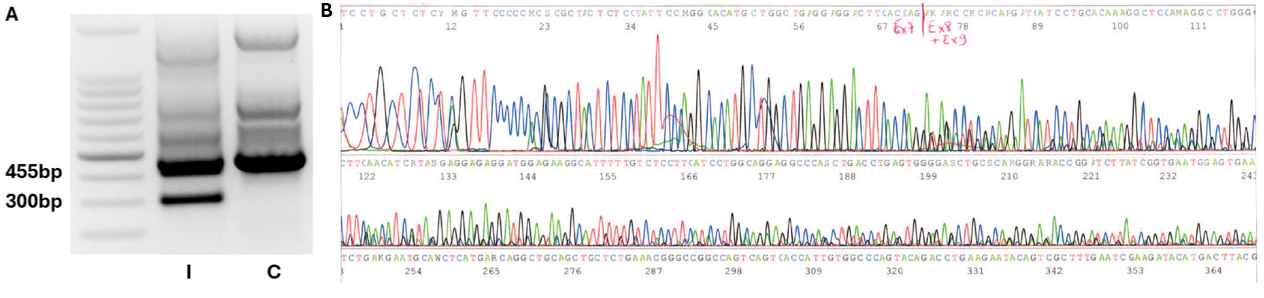


**Figure 1. RT-PCR on RNA and Sanger sequencing performed in individual 4.** (A) Electrophoresis showed two bands : one of the expected size (455bp) and the other around 300bp on the gel. Abbreviations: M: marker, I: individual 4, C: negative control. (B) Direct DNA sequencing results showing a dual sequence after exon 7 and the absence of exon 8 in heterozygous state. Separation between the end of exon 7 and the beginning of exon 8 or 9 is represented by a red line. Abbreviation: Ex: exon.


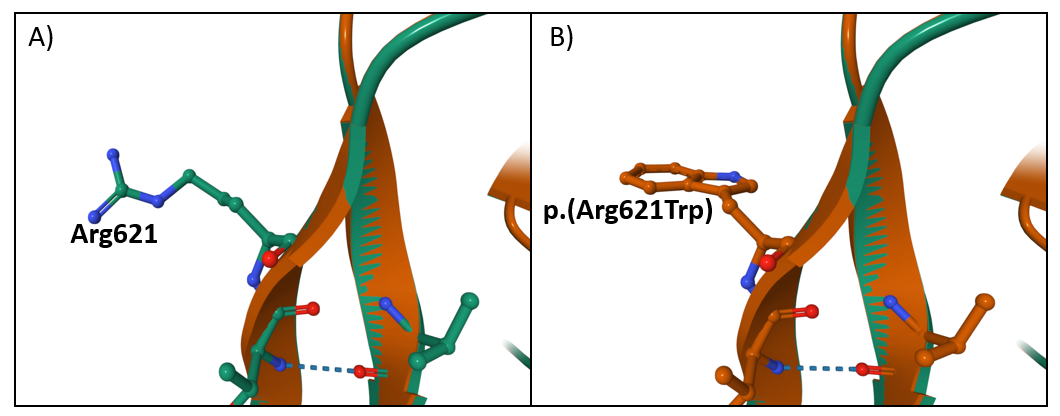


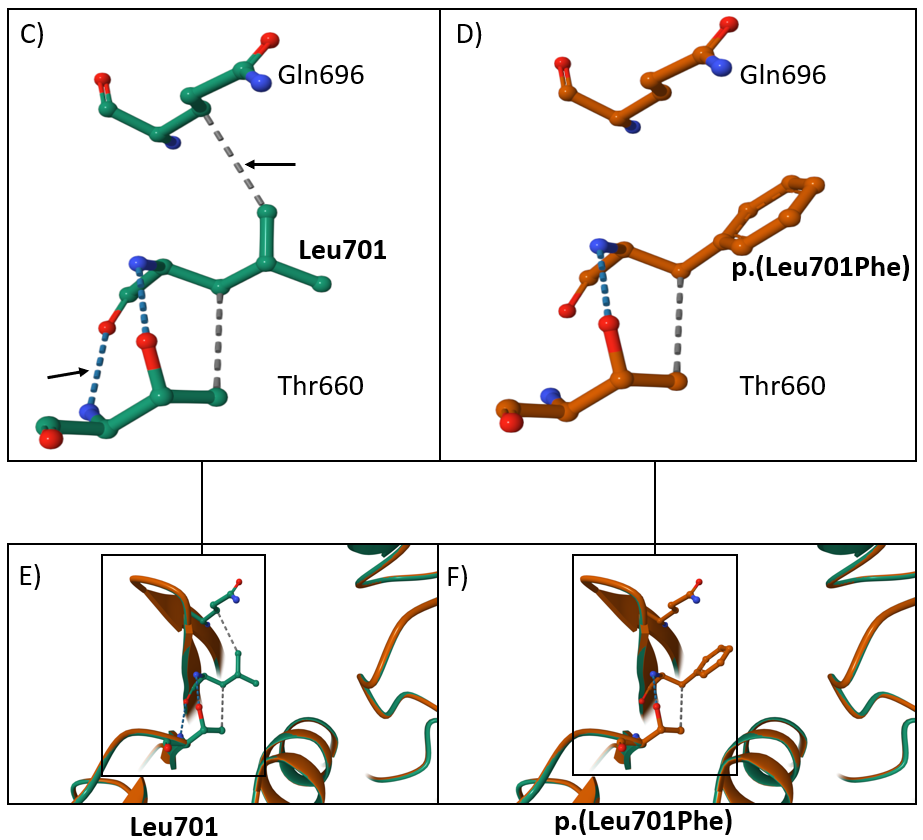


**Figure 2. Modelling of two missense VUS from the literature.** The prediction models for the p.(Leu496Phe) and the p.(Asp598Asn) variants are of low confidence and are not shown in the figure. A) and B) show wild-type residue 621 and the missense p.(Arg621Trp) variant respectively. No difference in binding is found. C) and E) show wild-type residue 701 and its environment, and bonds of interest lost with the variant (black arrows). D) and F) show the p.(Leu701Phe) variant and the loss of a hydrogen bond (blue dotted line) and a non-covalent hydrophobic bond (grey dotted line).
