# Supplementary material for: Further phenotypical delineation of DLG3-related neurodevelopmental disorders
Source: Research Square preprint supplement (doi:10.21203/rs.3.rs-5998122/v1), 2025-03-10
Supplement: Supplementary file 3 [file 9b96e096cc05b15f497c3c1a.docx]

**Table 2.** Clinical and molecular features of individuals carrying a likely pathogenic or pathogenic *DLG3* variant.

|  | **Individual 1** | **Individual 2** | **Individual 3** | **Individual 4** | | **Individual 5** | **Individual 6** | | **Individual 7** | **Individual 8** | **Individual 9** | **Individual 10** | |
| --- | --- | --- | --- | --- | --- | --- | --- | --- | --- | --- | --- | --- | --- |
| Gender | Male | Male | Male | Male | | Male | Male | | Female | Male | Male | Male | |
| Age | 2Y9M | 8Y1M | 13Y6M | 11Y3M | | 8Y | 19Y | | 3Y6M | 6Y6M | 23Y | 4Y | |
| **Gestation and birth** | |  |  |  | |  |  | |  |  |  |  | |
| Events during pregnancy | - | - | Domestic violence | - | | - | GD, choroid plexus cysts (not confirmed after) | | - | - | Mildly elevated blood pressure in last trimester | GD | |
| Age of delivery (weeks of gestational age) | 37+3 | 41+2 | 36 | 37 | | 40 | 39 | | 40 | 39 | 40 | 40+6 | |
| Events during delivery/perinatal period | - | Induction of labour for term | - | - | | - | - | | - | - | Prolonged delivery | - | |
| Birth weight: g (percentile) | 2,990 (46th) | 3,440 (20th) | 2,000 (4th) | 2,800 (37th) | | 3,710 (62th) | 4,100 (94th) | | 3,390 (48th) | 2,620 (5th) | 3,232 (23th) | 3,960 (66th) | |
| Birth length: cm (percentile) | 47.5 (31st) | 48.5 (4th) | 43 (4th) | 47 (30th) | | 50.5 (38th) | 53 (89th) | | 44 (0th) | 46.5 (5th) | NA (normal) | 50 (19th) | |
| Birth OFC: cm (percentile) | 34 (61th) | 34 (11th) | 31 (13th) | 33 (41tth) | | 34.5 (35th) | 35 (63th) | | 33.5 (19th) | 34 (36th) | NA (normal) | 34.5 (24th) | |
| Events during neonatal period | - | Nasal regurgitation (cleft palate) | - | - | | - | - | | Slow weight gain | - | Jaundice requiring phototherapy | Suspicion of maternal-fetal infection | |
| **Last measurements** | |  |  |  | |  |  | |  |  |  |  | |
| Weight: kg (percentile) | 12.5 (16th) | 21 (6th) | 35.15 (3th) | 43.5 (78th) | | At 6Y: 21 (54th) | 72 (60th) | | NA | 34.5 (99th) | 58.2 (10th) | 14 (9th) | |
| Height: cm (percentile) | 89.5 (17th) | 121 (10th) | 151 (13th) | 138.5 (19th) | | At 6Y: 114 (39th) | 193 (99th) | | NA | 128 (96th) | 166 (7th) | 97.5 (13th) | |
| OFC: cm (percentile) | 49.7 (55th) | 50 (5th) | 52 (6th) | 50 (1st) | | At 6Y: 50 (13th) | 58 (98th) | | NA | 52 (58th) | 55.4 (58th) | 52.5 (93th) | |
| **Neurodevelopment and neurological findings** | | | | |  |  | |  |  | | |  |  |
| Intellectual disability (ID) | Suspected | + | + | + | | + | + | | Suspected | + | + | Suspected | |
| Type | NA | Moderate ID | Mild/  Moderate ID | Moderate ID | | Mild ID | Mild ID | | NA | Mild ID | Moderate ID | NA | |
| Developmental delay | + | + | + | + | | + | + | | + | + | + | + | |
| Type | Global | Global | Global | Global | | Global | Language | | Global | Language | Fine motor | Global | |
| Age of sitting | 11.5M | NA | 10M | NA | | 9M | NA | | NA | NA | 8M | 12M | |
| Age of walking | 30M  (with assistance) | 23M | 24M | 28M | | 22M | 17M | | 3Y6M (unsteady gait, with pedal splint) | 13M | 14M | 24M | |
| Age of first words | NA | 2Y | 24M | NA | | 3-4Y | 18M | | NA | 24M | 14M | 3Y | |
| Age of first sentences | Not acquired | 5Y11M | NA | Around 7Y | | 6Y (incomplete sentences) | NA | | Not acquired | NA | 2.5-3Y | NA | |
| Language at last assessment | Few isolated words and bisyllabisms | Few sentences | Sentences | Short sentences | | Simple sentences, pronunciation difficulties | Satisfactory | | 3-5 words | Sentences | WISC-III scaled score for verbal ability: 52 | Few short sentences | |
| Other neurodevelopmental disorders | - | ASD, stereotypy | Agitation, hyperactive behavior under treatment | Agitation, motor stereotypy | | ADHD | ADHD | | Hyperactive behavior | - | - | Agitation, risky behavior | |
| Psychiatric disorders | - | - | Auto-aggressiveness | Behavioral disorders, anxiety | | Behavioral disorders (aggressive-ness, change intolerance) | - | | NA | - | Anxiety, compulsive tendencies, mild/subclinical depression, phobias, and psychosis | - | |
| Seizures | - | - | - | Beginning by status epilepticus at 2A9M | | - | - | | - | 7 fever-induced tonic-clonic seizures | - | - | |
| Other neurologic features | Generalized hypotonia, enlargement of the support polygon during walking | Mild global hypotonia | Facial hypotonia, sialorrhea | - | | - | - | | Hypotonia | - | - | Enlargement of the support polygon during walking | |
| Brain imagery | NA | Small anterior pituitary gland | Unremarkable | Unremarkable | | Corpus callosum a little short | Unremarkable | | NA | Unremarkable | Unremarkable | Unremarkable | |
| **Morphological features** | |  |  |  | |  |  | |  |  |  |  | |
| Abnormal morphological features | + | + | + | + | | + | - | | + | + | - | + | |
| Details | Prominent forehead, anteverted nostrils, columella abnormality, high-arched palate, thick downturned lips, slight clubbed and broad thumbs, pes planus | Long face, narrow palpebral fissures, ptosis, long nose, bifid uvula, high-arched palate | Mild bilateral ptosis, wide nasal bridge and abnormal nasal morphology, malar flattening, thin lips | Long philtrum, downturned corners of mouth, malar flattening | | Brachycephaly, anteverted nares, mild prognathism, fetal pads, hypertrichosis | - | | Absent nasal bridge, thin upper lip, small chin | Synophris, down-slanting palpebral fissures, everted inferior eyelid, , thick earlobes, facial hypertrichosis | - | High proeminent forehead, frontal bossing, deep-set eyes | |
| **Sensorineural and other findings** | | |  |  | |  |  | |  |  |  |  | |
| Visual impairments | NA | - | - | - | | - | - | | - | Hypermetropia, astigmatism | - | NA | |
| Strabismus | - | - | - | - | | UCS | - | | CS | - | - | - | |
| Auditory impairments | NA | - | - | - | | - | - | | NA | NA | - | - | |
| Other clinical features | Fingers joints hypermobility, tendency to elbows retraction | Cleft palate, dental dyschromia, dento-maxillary disharmony | Severe constipation, encopresis | - | | Decreased pain sensitivity (reported by parents) | - | | Premature closure of fontanelle, giant congenital naevi | - | Hypospadias | Bilateral ankle hypermobility | |
| **Variants** | |  |  |  | |  |  | |  |  |  |  | |
| Variant (cDNA) | c.131dup | c.691A>T | c.1015dup | c.1302+5G>A | | c.1349_1350del | c.1462dup | | c.1619_1628del | c.2266C>T | Not applicable, deletion encompassing the last exon | c.2371G>T | |
| Variant (protein) | p.(Asn45GlnfsTer44) | p.(Lys231Ter) | p.(Ser339LysfsTer3) | p.? | | p.(Ala450GlyfsTer18) | p.(Ser488LysfsTer13) | | p.(Asp540GlyfsTer7) | p.(Arg756Ter) | p.(Glu791Ter) | |

Abbreviations: Y: years; M: months; GD: gestational diabetes; NA: not available; OFC: occipital frontal circumference; ASD: autism spectrum disorder; ADHD: attention disorder with or without hyperactivity; UCS: unilateral convergent strabismus; CS: convergent strabismus.
