# Supplementary material for: Further phenotypical delineation of DLG3-related neurodevelopmental disorders
Source: Research Square preprint supplement (doi:10.21203/rs.3.rs-5998122/v1), 2025-03-10
Supplement: Supplementary file 4 [file e8ea55d157f820d115632bf9.docx]

**Table 1.** *DLG3* variants reported in the present cohort (excepted p.(Arg574Gln)).

| **Individuals** | **Variant**  **segregation** | **Genomic position**  **(GRCh38)** | **Coding DNA**  **(NM_** **021120.4)** | **Protein**  **(NP_066943.2)** |
| --- | --- | --- | --- | --- |
| **Likely pathogenic and pathogenic variants** | **Individual 1** | Inherited | chrX:g.70445332dup | c.131dup | p.(Asn45GlnfsTer44) |
| **Individual 2** | Inherited | chrX:g.70449847A>T | c.691A>T | p.(Lys231Ter) |
| **Individual 3** | Inherited | chrX:g.70451896dup | c.1015dup | p.(Ser339LysfsTer3) |
| **Individual 4** | *De novo* | chrX:g.70453798G>A | c.1302+5G>A | p.? |
| **Individual 5** | Inherited  (*de novo* in the mother) | chrX:g.70454260_70454261del | c.1349_1350del | p.(Ala450GlyfsTer18) |
| **Individual 6** | *De novo* | chrX:g.70479206dup | c.1462dup | p.(Ser488LysfsTer13) |
| **Individual 7** | Inherited | chrX:g.70492205_70492214del | c.1619_1628del | p.(Asp540GlyfsTer7) |
| **Individual 8** | Inherited | chrX:g.70500908C>T | c.2266C>T | p.(Arg756Ter) |
| **Individual 9** | *De novo* | chrX:g.(70500990_70502096)_(70502336_?)del | - | - |
| **Individual 10** | Inherited | chrX:g.70502186G>T | c.2371G>T | p.(Glu791Ter) |
| **Variants of uncertain significance** | **Individual 11** | Inherited  (low level mosaicism: 3%) | chrX:g.70450309A>G | c.840+4A>G | p.? |
| **Individual 12** | Inherited | chrX:g.70453644C>T | c.1153C>T | p.(Arg385Cys) |
| **Individual 13** | Inherited | chrX:g.70479216C>G | c.1472C>G | p.(Ser491Cys) |
| **Individuals 14 and 15*** | Inherited | chrX:g.70499885C>T | c.1981C>T | p.(Arg661Trp) |
| **Individual 16** | Inherited | chrX:g.70502121_70502159delinsAAGAGGAAAACAAAATTATTACTGTATACAG | c.2348-42_2348-4delinsAAGAGGAAAACAAAATTATTACTGTATACAG | p.? |
| **Individual 17** | Inherited | arr Xq13.1(69720890-69722017)x0 | - | - |

* brothers
